# Supplementary material for: Association of Maternal Perinatal SARS-CoV-2 Infection With Neonatal Outcomes During the COVID-19 Pandemic in Massachusetts
Source: PubMed Central journal article supplement (PMC8065376; doi:10.1001/jamanetworkopen.2021.7523), 2021-04-23
Supplement: jamanetwopen-e217523-s001.pdf [file jamanetwopen-e217523-s001.pdf]

## Supplementary Online Content

Angelidou A, Sullivan K, Melvin PR, et al. Association of maternal perinatal SARS-CoV-2 infection with neonatal outcomes during the COVID-19 pandemic in Massachusetts. *JAMA Netw Open*. 2021;4(4):e217523.  
doi:10.1001/jamanetworkopen.2021.7523

**eFigure.** Participating MA Hospitals, Level of Care, and Yearly Births

**eTable 1.** MA Newborn Cases With Positive SARS-CoV-2 Testing Born to Mothers With SARS-CoV-2

**eTable 2.** Characteristics of Newborns Who Were Tested vs Not During Their Hospital Stay

**eTable 3.** Characteristics of Newborns With Negative and Positive SARS-CoV-2 Test(s)

**eTable 4.** Characteristics of Newborns With and Without Post-Discharge EMR Information

**eTable 5.** Newborn Cases Who Were Re-Hospitalized Within 30 Days From Birth Hospital Discharge

This supplementary material has been provided by the authors to give readers additional information about their work.

**eFigure. Participating MA Hospitals, Level of Care and Yearly Births**

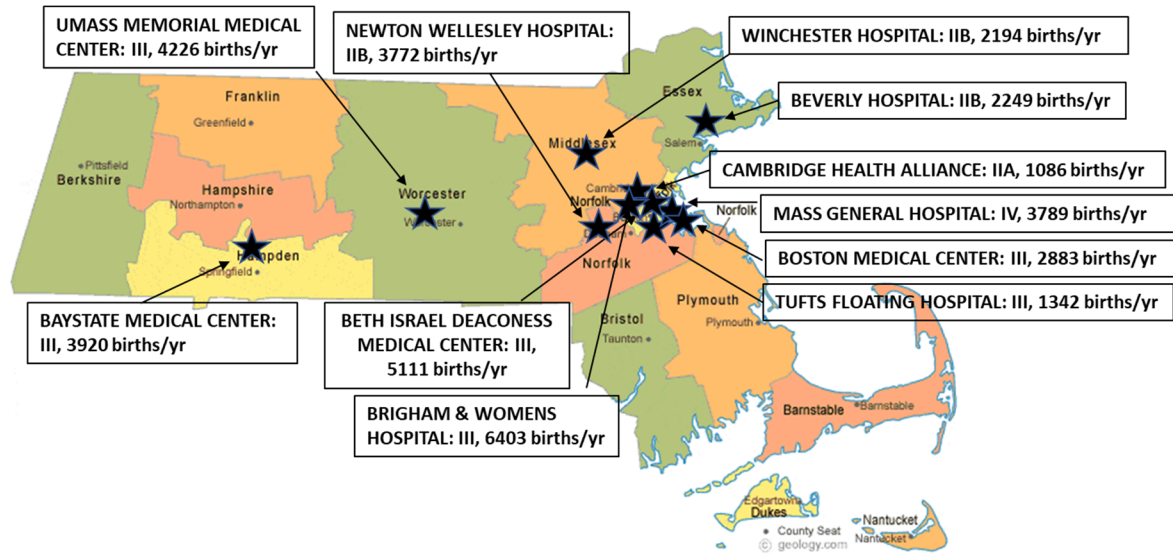

Source: Massachusetts Department of Public Health, 2017.

**eTable 1. MA Newborn Cases with Positive SARS-CoV-2 Testing Born to Mothers With SARS-CoV-2.**

| Testing period                         | In-hospital                              |                          |             |                    |                    | After discharge                        |
|----------------------------------------|------------------------------------------|--------------------------|-------------|--------------------|--------------------|----------------------------------------|
| Case number                            | Case 1                                   | Case 2                   | Case 3      | Case 4             | Case 5             | Case 6                                 |
| Hospital                               | A                                        | A                        | A           | B                  | C                  | A                                      |
| Maternal race/ethnicity                | Hispanic                                 | Non-Hispanic Black       | Hispanic    | Non-Hispanic White | Non-Hispanic Other | Hispanic                               |
| Maternal language                      | English                                  | English                  | Spanish     | English            | Spanish            | Spanish                                |
| SVI $\geq 90^{\text{th}}$ percentile   | Yes                                      | No                       | Yes         | Yes                | No                 | Yes                                    |
| Maternal COVID-19 symptoms at delivery | Yes                                      | Yes                      | Yes         | No                 | No                 | Yes                                    |
| Mode of delivery                       | Cesarean                                 | Cesarean                 | Cesarean    | Cesarean           | Vaginal            | Vaginal                                |
| Preterm infant                         | Yes                                      | Yes                      | No          | No                 | No                 | No                                     |
| Gestational Age                        | 35 wk 1 d                                | 35 wk 1 d                | 38 wk 0 d   | 38 wk 0 d          | 41 wk 0 d          | 40 wk 2 d                              |
| Timing of infant testing               | HD1/HD2/HD5                              | HD1/HD2/HD4/HD5          | HD1/HD2/HD5 | HD3                | HD2                | HD1/HD2/ED D5                          |
| Sequence of infant testing             | +/+/+                                    | -/inconclusive/invalid/+ | -/+/-       | +                  | +                  | -/-/+                                  |
| Neonatal signs                         | Respiratory distress, feeding immaturity | Respiratory distress     | None        | None               | None               | Nasal congestion, rhinorrhea, sneezing |
| Any rooming-in                         | No                                       | No                       | Yes         | Yes                | Yes                | No                                     |
| Any direct breastfeeding               | No                                       | No                       | Yes         | No                 | Yes                | No                                     |

Abbreviations: ED, Emergency Department; HD, Hospital Day; NHB, non-Hispanic Black; NHW, non-Hispanic White; SVI, Social Vulnerability Index

**eTable 2. Characteristics of Newborns Who Were Tested vs Not During Their Hospital Stay.**

| Variable                                     | Infants tested during hospital stay (N= 225) | Infants not tested during hospital stay (N=30) | P Value <sup>a</sup> |
|----------------------------------------------|----------------------------------------------|------------------------------------------------|----------------------|
| <b>Social factors</b>                        |                                              |                                                |                      |
| Maternal race/ethnicity, No. (%)             |                                              |                                                | .20                  |
| Hispanic, any race                           | 110 (48.9)                                   | 13 (43.3)                                      |                      |
| Non-Hispanic white                           | 40 (17.8)                                    | 10 (33.3)                                      |                      |
| Non-Hispanic black                           | 43 (19.1)                                    | 5 (16.7)                                       |                      |
| Non-Hispanic other                           | 32 (14.2)                                    | 2 (6.7)                                        |                      |
| Black race or Hispanic ethnicity, No. (%)    |                                              |                                                | .38                  |
| Yes                                          | 153 (68.0)                                   | 18 (60.0)                                      |                      |
| No                                           | 72 (32.0)                                    | 12 (40.0)                                      |                      |
| Maternal language status, No. (%)            |                                              |                                                | .24                  |
| English                                      | 117 (52.0)                                   | 19 (63.3)                                      |                      |
| Non-English                                  | 108 (48.0)                                   | 11 (36.7)                                      |                      |
| Maternal SVI, No. (%)                        |                                              |                                                | .66                  |
| SVI ≥90 <sup>th</sup> percentile             | 61 (27.1)                                    | 7 (23.3)                                       |                      |
| <90 <sup>th</sup> percentile                 | 164 (72.9)                                   | 23 (76.7)                                      |                      |
| <b>Pregnancy and delivery factors</b>        |                                              |                                                |                      |
| Maternal illness, No. (%)                    |                                              |                                                | .54                  |
| Symptomatic                                  | 70 (31.1)                                    | 11 (36.7)                                      |                      |
| Asymptomatic                                 | 155 (68.9)                                   | 19 (63.3)                                      |                      |
| Cesarean delivery, No. (%)                   |                                              |                                                | .51                  |
| Yes                                          | 98 (43.6)                                    | 15 (50.0)                                      |                      |
| No                                           | 127 (56.4)                                   | 15 (50.0)                                      |                      |
| Preterm birth (<37 wk), No. (%)              |                                              |                                                | .12                  |
| Yes                                          | 50 (22.2)                                    | 3 (10.0)                                       |                      |
| No                                           | 175 (77.8)                                   | 27 (90.0)                                      |                      |
| <b>Newborn Characteristics</b>               |                                              |                                                |                      |
| Month of Birth, No. (%)                      |                                              |                                                | .95                  |
| March                                        | 15 (6.7)                                     | 2 (6.7)                                        |                      |
| April                                        | 68 (30.2)                                    | 11 (36.7)                                      |                      |
| May                                          | 78 (34.7)                                    | 10 (33.3)                                      |                      |
| June                                         | 50 (22.2)                                    | 5 (16.7)                                       |                      |
| July                                         | 14 (6.2)                                     | 2 (6.7)                                        |                      |
| Preterm (< 37 wk) or LBW (< 2500 g), No. (%) |                                              |                                                | .05                  |
| Yes                                          | 59 (26.2)                                    | 3 (10.0)                                       |                      |
| No                                           | 166 (73.8)                                   | 27 (90.0)                                      |                      |

|                                                                          |            |           |     |
|--------------------------------------------------------------------------|------------|-----------|-----|
| Resuscitation at Birth, No. (%)                                          |            |           | .56 |
| Drying and stimulation                                                   | 177 (78.7) | 25 (83.3) |     |
| Oxygen, positive pressure of any kind, intubation, or chest compressions | 48 (21.3)  | 5 (16.7)  |     |

Abbreviations: LBW, low birth weight; SVI, Social Vulnerability Index.

<sup>a</sup>P values account for hospital clustering using Cochran-Mantel-Haenszel chi-square tests.

**eTable 3. Characteristics of Newborns with Negative and Positive SARS-CoV-2 Test(s).**

| Variable                                  | Infants with negative test (N= 220) | Infants with positive test (N=6) | P Value <sup>a</sup> |
|-------------------------------------------|-------------------------------------|----------------------------------|----------------------|
| <b>Social factors</b>                     |                                     |                                  |                      |
| Maternal race/ethnicity, No. (%)          |                                     |                                  | .97                  |
| Hispanic, any race                        | 108 (49.1)                          | 3 (50.0)                         |                      |
| Non-Hispanic white                        | 39 (17.7)                           | 1 (16.7)                         |                      |
| Non-Hispanic black                        | 42 (19.1)                           | 1 (16.7)                         |                      |
| Non-Hispanic other                        | 31 (14.1)                           | 1 (16.7)                         |                      |
| Black race or Hispanic ethnicity, No. (%) |                                     |                                  | .48                  |
| Yes                                       | 150 (68.2)                          | 4 (66.7)                         |                      |
| No                                        | 70 (31.8)                           | 2 (33.3)                         |                      |
| Maternal language status, No. (%)         |                                     |                                  | .71                  |
| English                                   | 114 (51.8)                          | 3 (50.0)                         |                      |
| Non-English                               | 106 (48.2)                          | 3 (50.0)                         |                      |
| Maternal SVI, No. (%)                     |                                     |                                  | .05                  |
| SVI ≥90 <sup>th</sup> percentile          | 57 (25.9)                           | 4 (66.7)                         |                      |
| <90 <sup>th</sup> percentile              | 163 (74.1)                          | 2 (33.3)                         |                      |
| <b>Pregnancy and delivery factors</b>     |                                     |                                  |                      |
| Maternal illness, No. (%)                 |                                     |                                  | .50                  |
| Symptomatic                               | 68 (30.9)                           | 3 (50.0)                         |                      |
| Asymptomatic                              | 152 (69.1)                          | 3 (50.0)                         |                      |
| Cesarean delivery, No. (%)                |                                     |                                  | .28                  |
| Yes                                       | 94 (42.7)                           | 4 (66.7)                         |                      |
| No                                        | 126 (57.3)                          | 2 (33.3)                         |                      |
| Preterm birth (<37 wk), No. (%)           |                                     |                                  | .26                  |
| Yes                                       | 49 (22.3)                           | 2 (33.3)                         |                      |
| No                                        | 171 (77.7)                          | 4 (66.7)                         |                      |
| <b>Hospital practices</b>                 |                                     |                                  |                      |
| Any rooming-in, No. (%)                   |                                     |                                  | .07                  |
| Yes                                       | 142 (64.5)                          | 2 (33.3)                         |                      |
| No                                        | 78 (35.5)                           | 4 (66.7)                         |                      |
| Any direct breastfeeding, No. (%)         |                                     |                                  | .08                  |
| Yes                                       | 127 (57.7)                          | 2 (33.3)                         |                      |
| No                                        | 93 (42.3)                           | 4 (66.7)                         |                      |

Abbreviations: SVI, Social Vulnerability Index.

<sup>a</sup>P values account for hospital clustering using Cochran-Mantel-Haenszel chi-square tests.

**eTable 4. Characteristics of Newborns With and Without Post-Discharge EMR Information.**

| Variable                                                                 | Any Infant Post-Discharge Encounter? |                |                      |
|--------------------------------------------------------------------------|--------------------------------------|----------------|----------------------|
|                                                                          | No<br>(N=104)                        | Yes<br>(N=151) | P value <sup>a</sup> |
| <b>Maternal Demographics/Social Factors</b>                              |                                      |                |                      |
| Race/Ethnicity, No. (%)                                                  |                                      |                |                      |
| Underrepresented Minority (Hispanic or Black)                            | 60 (57.7)                            | 111 (73.5)     | .84                  |
| Language, No. (%)                                                        |                                      |                |                      |
| English                                                                  | 66 (63.5)                            | 70 (46.4)      | .52                  |
| Spanish                                                                  | 27 (26.0)                            | 57 (37.7)      |                      |
| Other                                                                    | 11 (10.6)                            | 24 (15.9)      |                      |
| Maternal Age, mean (SD), y                                               | 30.1 (6.0)                           | 30.5 (6.5)     | .58                  |
| <b>Newborn Characteristics</b>                                           |                                      |                |                      |
| Inborn, No. (%)                                                          | 101 (97.1)                           | 146 (96.7)     | .69                  |
| Female, No. (%)                                                          | 56 (53.8)                            | 75 (49.7)      | .87                  |
| Month of Birth, No. (%)                                                  |                                      |                |                      |
| March                                                                    | 11 (10.6)                            | 6 (4.0)        | <b>.002</b>          |
| April                                                                    | 26 (25.0)                            | 53 (35.1)      |                      |
| May                                                                      | 31 (29.8)                            | 57 (37.7)      |                      |
| June                                                                     | 28 (26.9)                            | 27 (17.9)      |                      |
| July                                                                     | 8 (7.7)                              | 8 (5.3)        |                      |
| Preterm (< 37 wk) or LBW (< 2500 g), No. (%)                             | 26 (25.0)                            | 36 (23.8)      | .07                  |
| Resuscitation at Birth, No. (%)                                          |                                      |                |                      |
| Drying and stimulation                                                   | 79 (76.0)                            | 123 (81.5)     | .75                  |
| Oxygen, positive pressure of any kind, intubation, or chest compressions | 25 (24.0)                            | 28 (18.5)      |                      |

Abbreviations: LBW, low birth weight.

<sup>a</sup>P values account for hospital clustering using Cochran-Mantel-Haenszel chi-square tests.

**eTable 5. Newborn Cases Who Were Re-Hospitalized Within 30 Days From Birth Hospital Discharge.**

|                           | <b>Case 1</b>                                                                                                                                                                                                                                                                       | <b>Case 2</b>                                                                          | <b>Case 3</b>                                          | <b>Case 4</b>                                                                        |
|---------------------------|-------------------------------------------------------------------------------------------------------------------------------------------------------------------------------------------------------------------------------------------------------------------------------------|----------------------------------------------------------------------------------------|--------------------------------------------------------|--------------------------------------------------------------------------------------|
| <b>Clinical synopsis</b>  | Presented to the ED on day of life 3 with hematemesis, had an apneic/bradycardic episode and was admitted for full sepsis evaluation. Was discharged after 48 hours of antibiotics, blood culture subsequently returned positive for micrococcus luteus thought to be a contaminant | Admitted at 2 weeks of life for initiation of propranolol for a ventricular arrhythmia | Admitted for hyperbilirubinemia due to G6PD deficiency | Admitted for respiratory distress and was subsequently diagnosed with laryngomalacia |
| <b>Viral testing done</b> | No                                                                                                                                                                                                                                                                                  | Yes                                                                                    | No                                                     | Yes                                                                                  |
| <b>Viral test results</b> | NA                                                                                                                                                                                                                                                                                  | Negative                                                                               | NA                                                     | Negative                                                                             |

Abbreviations: NA, Not applicable.
